# Supplementary material
Source: MDPI journal article supplement (https://www.mdpi.com/2071-1050/10/6/1747)
Supplement: s1 [file s1]

| Input variables |             |            |                       | HSI values                         |                           |                              |                                     |                                            |                                                |
|-----------------|-------------|------------|-----------------------|------------------------------------|---------------------------|------------------------------|-------------------------------------|--------------------------------------------|------------------------------------------------|
| Velocity        | Water depth | Substratum | Recreational pressure | Habitat type 1:<br>Adults Spawning | Habitat type 2:<br>Larvae | Habitat type 3:<br>Juveniles | Habitat type 4:<br>Adults in Winter | Habitat type 5:<br>Adults pre-reproduction | Habitat type 6:<br>Adults in Summer and Autumn |
| VH              | VH          | VH         | VH                    | VL                                 | VL                        | VL                           | VL                                  | VL                                         | VL                                             |
| VH              | VH          | H          | VH                    | VL                                 | VL                        | VL                           | VL                                  | VL                                         | VL                                             |
| VH              | VH          | M          | VH                    | VL                                 | VL                        | VL                           | VL                                  | VL                                         | VL                                             |
| VH              | VH          | L          | VH                    | VL                                 | VL                        | VL                           | VL                                  | VL                                         | VL                                             |
| VH              | H           | VH         | VH                    | VL                                 | VL                        | VL                           | VL                                  | VL                                         | VL                                             |
| VH              | H           | H          | VH                    | VL                                 | VL                        | VL                           | VL                                  | VL                                         | VL                                             |
| VH              | H           | M          | VH                    | VL                                 | VL                        | VL                           | VL                                  | VL                                         | VL                                             |
| VH              | H           | L          | VH                    | VL                                 | VL                        | VL                           | VL                                  | VL                                         | VL                                             |
| VH              | M           | VH         | VH                    | VL                                 | VL                        | VL                           | VL                                  | VL                                         | VL                                             |
| VH              | M           | H          | VH                    | L                                  | VL                        | VL                           | VL                                  | VL                                         | VL                                             |
| VH              | M           | M          | VH                    | L                                  | VL                        | VL                           | VL                                  | VL                                         | VL                                             |
| VH              | M           | L          | VH                    | L                                  | VL                        | VL                           | VL                                  | VL                                         | VL                                             |
| VH              | L           | VH         | VH                    | VL                                 | VL                        | VL                           | VL                                  | VL                                         | VL                                             |
| VH              | L           | H          | VH                    | L                                  | VL                        | VL                           | VL                                  | VL                                         | VL                                             |
| VH              | L           | M          | VH                    | L                                  | VL                        | VL                           | VL                                  | VL                                         | VL                                             |
| VH              | L           | L          | VH                    | L                                  | VL                        | VL                           | VL                                  | VL                                         | VL                                             |
| VH              | VL          | VH         | VH                    | VL                                 | VL                        | VL                           | VL                                  | VL                                         | VL                                             |
| VH              | VL          | H          | VH                    | VL                                 | VL                        | VL                           | VL                                  | VL                                         | VL                                             |
| VH              | VL          | M          | VH                    | VL                                 | VL                        | VL                           | VL                                  | VL                                         | VL                                             |
| VH              | VL          | L          | VH                    | VL                                 | VL                        | VL                           | VL                                  | VL                                         | VL                                             |
| H               | VH          | VH         | VH                    | VL                                 | VL                        | VL                           | VL                                  | VL                                         | VL                                             |

|   |    |    |    |    |    |    |    |    |    |
|---|----|----|----|----|----|----|----|----|----|
| H | VH | H  | VH | VL | VL | VL | VL | VL | VL |
| H | VH | M  | VH | VL | VL | VL | VL | VL | VL |
| H | VH | L  | VH | VL | VL | VL | VL | VL | VL |
| H | H  | VH | VH | VL | VL | VL | VL | VL | VL |
| H | H  | H  | VH | VL | VL | VL | VL | VL | VL |
| H | H  | M  | VH | VL | VL | VL | VL | VL | VL |
| H | H  | L  | VH | VL | VL | VL | VL | VL | VL |
| H | M  | VH | VH | VL | VL | VL | VL | VL | VL |
| H | M  | H  | VH | H  | VL | VL | VL | VL | VL |
| H | M  | M  | VH | H  | VL | VL | VL | VL | VL |
| H | M  | L  | VH | M  | VL | VL | VL | VL | VL |
| H | L  | VH | VH | VL | VL | VL | VL | VL | VL |
| H | L  | H  | VH | VH | VL | VL | VL | VL | VL |
| H | L  | M  | VH | VH | VL | VL | VL | VL | VL |
| H | L  | L  | VH | M  | VL | VL | VL | VL | VL |
| H | VL | VH | VH | VL | VL | VL | VL | VL | VL |
| H | VL | H  | VH | VL | VL | VL | VL | VL | VL |
| H | VL | M  | VH | VL | VL | VL | VL | VL | VL |
| H | VL | L  | VH | VL | VL | VL | VL | VL | VL |
| M | VH | VH | VH | VL | VL | VL | VL | VL | VL |
| M | VH | H  | VH | VL | VL | VL | VL | VL | VL |
| M | VH | M  | VH | VL | VL | VL | VL | VL | VL |
| M | VH | L  | VH | VL | VL | VL | VL | VL | VL |
| M | H  | VH | VH | VL | VL | VL | VL | VL | VL |
| M | H  | H  | VH | VL | VL | VL | VL | VL | VL |
| M | H  | M  | VH | VL | VL | VL | VL | VL | VL |
| M | H  | L  | VH | VL | VL | VL | VL | VL | VL |
| M | M  | VH | VH | VL | VL | VL | VL | VL | VL |
| M | M  | H  | VH | L  | VL | VL | VL | VL | VL |

|   |    |    |    |    |    |    |    |    |    |
|---|----|----|----|----|----|----|----|----|----|
| M | M  | M  | VH | L  | VL | VL | VL | VL | VL |
| M | M  | L  | VH | L  | L  | VL | VL | VL | VL |
| M | L  | VH | VH | VL | VL | VL | VL | VL | VL |
| M | L  | H  | VH | M  | VL | VL | VL | VL | VL |
| M | L  | M  | VH | M  | L  | VL | VL | VL | VL |
| M | L  | L  | VH | L  | M  | VL | VL | VL | VL |
| M | VL | VH | VH | VL | VL | VL | VL | VL | VL |
| M | VL | H  | VH | VL | VL | VL | VL | VL | VL |
| M | VL | M  | VH | VL | VL | VL | VL | VL | VL |
| M | VL | L  | VH | VL | L  | VL | VL | VL | VL |
| L | VH | VH | VH | VL | VL | VL | VL | VL | VL |
| L | VH | H  | VH | VL | VL | VL | VL | VL | VL |
| L | VH | M  | VH | VL | VL | VL | VL | VL | VL |
| L | VH | L  | VH | VL | VL | VL | VL | VL | VL |
| L | H  | VH | VH | VL | VL | VL | VL | VL | VL |
| L | H  | H  | VH | VL | VL | VL | VL | VL | VL |
| L | H  | M  | VH | VL | VL | VL | VL | VL | VL |
| L | H  | L  | VH | VL | VL | VL | VL | VL | VL |
| L | M  | VH | VH | VL | L  | VL | VL | VL | VL |
| L | M  | H  | VH | VL | L  | VL | VL | VL | VL |
| L | M  | M  | VH | VL | L  | VL | VL | VL | VL |
| L | M  | L  | VH | VL | M  | VL | VL | VL | VL |
| L | L  | VH | VH | VL | VL | VL | VL | VL | VL |
| L | L  | H  | VH | VL | VL | VL | VL | VL | VL |
| L | L  | M  | VH | VL | H  | VL | VL | VL | VL |
| L | L  | L  | VH | VL | VH | VL | VL | VL | VL |
| L | VL | VH | VH | VL | VL | VL | VL | VL | VL |
| L | VL | H  | VH | VL | VL | VL | VL | VL | VL |
| L | VL | M  | VH | VL | M  | VL | VL | VL | VL |

|    |    |    |    |    |    |    |    |    |    |
|----|----|----|----|----|----|----|----|----|----|
| L  | VL | L  | VH | VL | H  | VL | VL | VL | VL |
| VL | VH | VH | VH | VL | VL | VL | VL | VL | VL |
| VL | VH | H  | VH | VL | VL | VL | VL | VL | VL |
| VL | VH | M  | VH | VL | VL | VL | VL | VL | VL |
| VL | VH | L  | VH | VL | VL | VL | VL | VL | VL |
| VL | H  | VH | VH | VL | VL | VL | VL | VL | VL |
| VL | H  | H  | VH | VL | VL | VL | VL | VL | VL |
| VL | H  | M  | VH | VL | VL | VL | VL | VL | VL |
| VL | H  | L  | VH | VL | VL | VL | VL | VL | VL |
| VL | M  | VH | VH | VL | VL | VL | VL | VL | VL |
| VL | M  | H  | VH | VL | VL | VL | VL | VL | VL |
| VL | M  | M  | VH | VL | VL | VL | VL | VL | VL |
| VL | M  | L  | VH | VL | VL | VL | VL | VL | VL |
| VL | L  | VH | VH | VL | VL | VL | VL | VL | VL |
| VL | L  | H  | VH | VL | VL | VL | VL | VL | VL |
| VL | L  | M  | VH | VL | VL | VL | VL | VL | VL |
| VL | L  | L  | VH | VL | VL | VL | VL | VL | VL |
| VL | VL | VH | VH | VL | VL | VL | VL | VL | VL |
| VL | VL | H  | VH | VL | VL | VL | VL | VL | VL |
| VL | VL | M  | VH | VL | VL | VL | VL | VL | VL |
| VL | VL | L  | VH | VL | VL | VL | VL | VL | VL |
| VH | VH | VH | H  | VL | VL | VL | VL | VL | VL |
| VH | VH | H  | H  | VL | VL | VL | VL | VL | VL |
| VH | VH | M  | H  | VL | VL | VL | VL | VL | VL |
| VH | VH | L  | H  | VL | VL | VL | VL | VL | VL |
| VH | H  | VH | H  | VL | VL | VL | M  | VL | M  |
| VH | H  | H  | H  | VL | VL | VL | M  | VL | M  |
| VH | H  | M  | H  | VL | VL | VL | M  | VL | M  |
| VH | H  | L  | H  | VL | VL | VL | M  | VL | M  |

|    |    |    |   |    |    |    |    |    |    |
|----|----|----|---|----|----|----|----|----|----|
| VH | M  | VH | H | VL | VL | VL | L  | VL | L  |
| VH | M  | H  | H | L  | VL | VL | L  | VL | L  |
| VH | M  | M  | H | L  | VL | VL | L  | VL | L  |
| VH | M  | L  | H | L  | VL | VL | L  | VL | L  |
| VH | L  | VH | H | VL | VL | VL | VL | VL | VL |
| VH | L  | H  | H | L  | VL | VL | VL | VL | VL |
| VH | L  | M  | H | L  | VL | VL | VL | VL | VL |
| VH | L  | L  | H | L  | VL | VL | VL | VL | VL |
| VH | VL | VH | H | VL | VL | VL | VL | VL | VL |
| VH | VL | H  | H | VL | VL | VL | VL | VL | VL |
| VH | VL | M  | H | VL | VL | VL | VL | VL | VL |
| VH | VL | L  | H | VL | VL | VL | VL | VL | VL |
| H  | VH | VH | H | VL | VL | VL | VL | VL | VL |
| H  | VH | H  | H | VL | VL | VL | VL | VL | VL |
| H  | VH | M  | H | VL | VL | VL | VL | VL | VL |
| H  | VH | L  | H | VL | VL | VL | VL | VL | VL |
| H  | H  | VH | H | VL | VL | VL | M  | VL | M  |
| H  | H  | H  | H | VL | VL | VL | M  | VL | M  |
| H  | H  | M  | H | VL | VL | VL | M  | VL | M  |
| H  | H  | L  | H | VL | VL | VL | M  | VL | M  |
| H  | M  | VH | H | VL | VL | VL | L  | VL | L  |
| H  | M  | H  | H | H  | VL | VL | L  | VL | L  |
| H  | M  | M  | H | H  | VL | VL | L  | VL | L  |
| H  | M  | L  | H | M  | VL | VL | L  | VL | L  |
| H  | L  | VH | H | VL | VL | VL | VL | VL | VL |
| H  | L  | H  | H | VH | VL | VL | VL | VL | VL |
| H  | L  | M  | H | VH | VL | VL | VL | VL | VL |
| H  | L  | L  | H | M  | VL | VL | VL | VL | VL |
| H  | VL | VH | H | VL | VL | VL | VL | VL | VL |

|   |    |    |   |    |    |    |    |    |    |
|---|----|----|---|----|----|----|----|----|----|
| H | VL | H  | H | VL | VL | VL | VL | VL | VL |
| H | VL | M  | H | VL | VL | VL | VL | VL | VL |
| H | VL | L  | H | VL | VL | VL | VL | VL | VL |
| M | VH | VH | H | VL | VL | VL | VL | VL | VL |
| M | VH | H  | H | VL | VL | VL | VL | VL | VL |
| M | VH | M  | H | VL | VL | VL | VL | VL | VL |
| M | VH | L  | H | VL | VL | VL | VL | VL | VL |
| M | H  | VH | H | VL | VL | VL | M  | VL | L  |
| M | H  | H  | H | VL | VL | VL | M  | VL | L  |
| M | H  | M  | H | VL | VL | VL | M  | VL | L  |
| M | H  | L  | H | VL | VL | VL | M  | VL | L  |
| M | M  | VH | H | VL | VL | L  | L  | VL | L  |
| M | M  | H  | H | L  | VL | L  | L  | VL | L  |
| M | M  | M  | H | L  | VL | L  | L  | VL | L  |
| M | M  | L  | H | L  | L  | L  | L  | VL | L  |
| M | L  | VH | H | VL | VL | L  | VL | VL | VL |
| M | L  | H  | H | M  | VL | L  | VL | VL | VL |
| M | L  | M  | H | M  | L  | L  | VL | VL | VL |
| M | L  | L  | H | L  | M  | L  | VL | VL | VL |
| M | VL | VH | H | VL | VL | L  | VL | VL | VL |
| M | VL | H  | H | VL | VL | L  | VL | VL | VL |
| M | VL | M  | H | VL | VL | L  | VL | VL | VL |
| M | VL | L  | H | VL | L  | L  | VL | VL | VL |
| L | VH | VH | H | VL | VL | VL | VL | VL | VL |
| L | VH | H  | H | VL | VL | VL | VL | VL | VL |
| L | VH | M  | H | VL | VL | VL | VL | VL | VL |
| L | VH | L  | H | VL | VL | VL | VL | VL | VL |
| L | H  | VH | H | VL | VL | VL | L  | VL | VL |
| L | H  | H  | H | VL | VL | VL | L  | VL | VL |

|    |    |    |   |    |    |    |    |    |    |
|----|----|----|---|----|----|----|----|----|----|
| L  | H  | M  | H | VL | VL | VL | L  | VL | VL |
| L  | H  | L  | H | VL | VL | VL | L  | VL | VL |
| L  | M  | VH | H | VL | L  | L  | L  | VL | VL |
| L  | M  | H  | H | VL | L  | L  | L  | VL | VL |
| L  | M  | M  | H | VL | L  | L  | L  | VL | VL |
| L  | M  | L  | H | VL | M  | L  | L  | VL | VL |
| L  | L  | VH | H | VL | VL | L  | VL | VL | VL |
| L  | L  | H  | H | VL | VL | M  | VL | VL | VL |
| L  | L  | M  | H | VL | H  | M  | VL | VL | VL |
| L  | L  | L  | H | VL | VH | L  | VL | VL | VL |
| L  | VL | VH | H | VL | VL | VL | VL | VL | VL |
| L  | VL | H  | H | VL | VL | VL | VL | VL | VL |
| L  | VL | M  | H | VL | M  | VL | VL | VL | VL |
| L  | VL | L  | H | VL | H  | VL | VL | VL | VL |
| VL | VH | VH | H | VL | VL | VL | VL | VL | VL |
| VL | VH | H  | H | VL | VL | VL | VL | VL | VL |
| VL | VH | M  | H | VL | VL | VL | VL | VL | VL |
| VL | VH | L  | H | VL | VL | VL | VL | VL | VL |
| VL | H  | VH | H | VL | VL | VL | VL | VL | VL |
| VL | H  | H  | H | VL | VL | VL | VL | VL | VL |
| VL | H  | M  | H | VL | VL | VL | VL | VL | VL |
| VL | H  | L  | H | VL | VL | VL | VL | VL | VL |
| VL | M  | VH | H | VL | VL | L  | VL | VL | VL |
| VL | M  | H  | H | VL | VL | L  | VL | VL | VL |
| VL | M  | M  | H | VL | VL | L  | VL | VL | VL |
| VL | M  | L  | H | VL | VL | L  | VL | VL | VL |
| VL | L  | VH | H | VL | VL | L  | VL | VL | VL |
| VL | L  | H  | H | VL | VL | M  | VL | VL | VL |
| VL | L  | M  | H | VL | VL | M  | VL | VL | VL |

|    |    |    |   |    |    |    |    |    |    |
|----|----|----|---|----|----|----|----|----|----|
| VL | L  | L  | H | VL | VL | L  | VL | VL | VL |
| VL | VL | VH | H | VL | VL | L  | VL | VL | VL |
| VL | VL | H  | H | VL | VL | L  | VL | VL | VL |
| VL | VL | M  | H | VL | VL | L  | VL | VL | VL |
| VL | VL | L  | H | VL | VL | L  | VL | VL | VL |
| VH | VH | VH | M | VL | VL | VL | VL | VL | VL |
| VH | VH | H  | M | VL | VL | VL | VL | VL | VL |
| VH | VH | M  | M | VL | VL | VL | VL | VL | VL |
| VH | VH | L  | M | VL | VL | VL | VL | VL | VL |
| VH | H  | VH | M | VL | VL | VL | VH | VL | H  |
| VH | H  | H  | M | VL | VL | VL | VH | VL | H  |
| VH | H  | M  | M | VL | VL | VL | VH | VL | H  |
| VH | H  | L  | M | VL | VL | VL | VH | VL | H  |
| VH | M  | VH | M | VL | VL | VL | H  | VL | VH |
| VH | M  | H  | M | L  | VL | VL | H  | VL | VH |
| VH | M  | M  | M | L  | VL | VL | H  | VL | VH |
| VH | M  | L  | M | L  | VL | VL | H  | VL | VH |
| VH | L  | VH | M | VL | VL | VL | VL | VL | VL |
| VH | L  | H  | M | L  | VL | VL | VL | VL | VL |
| VH | L  | M  | M | L  | VL | VL | VL | VL | VL |
| VH | L  | L  | M | L  | VL | VL | VL | VL | VL |
| VH | VL | VH | M | VL | VL | VL | VL | VL | VL |
| VH | VL | H  | M | VL | VL | VL | VL | VL | VL |
| VH | VL | M  | M | VL | VL | VL | VL | VL | VL |
| VH | VL | L  | M | VL | VL | VL | VL | VL | VL |
| H  | VH | VH | M | VL | VL | VL | VL | VL | VL |
| H  | VH | H  | M | VL | VL | VL | VL | VL | VL |
| H  | VH | M  | M | VL | VL | VL | VL | VL | VL |
| H  | VH | L  | M | VL | VL | VL | VL | VL | VL |



|   |    |    |   |    |    |    |    |    |    |
|---|----|----|---|----|----|----|----|----|----|
| H | H  | VH | M | VL | VL | VL | VH | VL | VH |
| H | H  | H  | M | VL | VL | VL | VH | VL | VH |
| H | H  | M  | M | VL | VL | VL | VH | VL | VH |
| H | H  | L  | M | VL | VL | VL | VH | VL | VH |
| H | M  | VH | M | VL | VL | VL | VH | VL | VH |
| H | M  | H  | M | H  | VL | VL | VH | VL | VH |
| H | M  | M  | M | H  | VL | VL | VH | VL | VH |
| H | M  | L  | M | M  | VL | VL | VH | VL | VH |
| H | L  | VH | M | VL | VL | VL | VL | VL | VL |
| H | L  | H  | M | VH | VL | VL | VL | VL | VL |
| H | L  | M  | M | VH | VL | VL | VL | VL | VL |
| H | L  | L  | M | M  | VL | VL | VL | VL | VL |
| H | VL | VH | M | VL | VL | VL | VL | VL | VL |
| H | VL | H  | M | VL | VL | VL | VL | VL | VL |
| H | VL | M  | M | VL | VL | VL | VL | VL | VL |
| H | VL | L  | M | VL | VL | VL | VL | VL | VL |
| M | VH | VH | M | VL | VL | VL | VL | VL | VL |
| M | VH | H  | M | VL | VL | VL | VL | VL | VL |
| M | VH | M  | M | VL | VL | VL | VL | VL | VL |
| M | VH | L  | M | VL | VL | VL | VL | VL | VL |
| M | H  | VH | M | VL | VL | VL | H  | VL | H  |
| M | H  | H  | M | VL | VL | VL | H  | VL | H  |
| M | H  | M  | M | VL | VL | VL | H  | VL | H  |
| M | H  | L  | M | VL | VL | VL | H  | VL | H  |
| M | M  | VH | M | VL | VL | M  | M  | VL | H  |
| M | M  | H  | M | L  | VL | M  | M  | VL | H  |
| M | M  | M  | M | L  | VL | M  | M  | VL | H  |
| M | M  | L  | M | L  | L  | M  | M  | VL | H  |
| M | L  | VH | M | VL | VL | M  | VL | VL | VL |

|    |    |    |   |    |    |    |    |    |    |
|----|----|----|---|----|----|----|----|----|----|
| M  | L  | H  | M | M  | VL | H  | VL | L  | VL |
| M  | L  | M  | M | M  | L  | H  | VL | L  | VL |
| M  | L  | L  | M | L  | M  | M  | VL | L  | VL |
| M  | VL | VH | M | VL | VL | M  | VL | VL | VL |
| M  | VL | H  | M | VL | VL | M  | VL | VL | VL |
| M  | VL | M  | M | VL | VL | M  | VL | VL | VL |
| M  | VL | L  | M | VL | L  | M  | VL | VL | VL |
| L  | VH | VH | M | VL | VL | VL | VL | VL | VL |
| L  | VH | H  | M | VL | VL | VL | VL | VL | VL |
| L  | VH | M  | M | VL | VL | VL | VL | VL | VL |
| L  | VH | L  | M | VL | VL | VL | VL | VL | VL |
| L  | H  | VH | M | VL | VL | VL | L  | VL | L  |
| L  | H  | H  | M | VL | VL | VL | L  | VL | L  |
| L  | H  | M  | M | VL | VL | VL | L  | VL | L  |
| L  | H  | L  | M | VL | VL | VL | L  | VL | L  |
| L  | M  | VH | M | VL | L  | M  | L  | VL | L  |
| L  | M  | H  | M | VL | L  | H  | L  | M  | L  |
| L  | M  | M  | M | VL | L  | H  | L  | M  | L  |
| L  | M  | L  | M | VL | M  | M  | L  | M  | L  |
| L  | L  | VH | M | VL | VL | M  | VL | VL | VL |
| L  | L  | H  | M | VL | VL | H  | VL | M  | VL |
| L  | L  | M  | M | VL | H  | H  | VL | M  | VL |
| L  | L  | L  | M | VL | VH | M  | VL | M  | VL |
| L  | VL | VH | M | VL | VL | VL | VL | VL | VL |
| L  | VL | H  | M | VL | VL | VL | VL | VL | VL |
| L  | VL | M  | M | VL | M  | VL | VL | VL | VL |
| L  | VL | L  | M | VL | H  | VL | VL | VL | VL |
| VL | VH | VH | M | VL | VL | VL | VL | VL | VL |
| VL | VH | H  | M | VL | VL | VL | VL | VL | VL |

|    |    |    |   |    |    |    |    |    |    |
|----|----|----|---|----|----|----|----|----|----|
| VL | VH | M  | M | VL | VL | VL | VL | VL | VL |
| VL | VH | L  | M | VL | VL | VL | VL | VL | VL |
| VL | H  | VH | M | VL | VL | VL | L  | VL | L  |
| VL | H  | H  | M | VL | VL | VL | L  | VL | L  |
| VL | H  | M  | M | VL | VL | VL | L  | VL | L  |
| VL | H  | L  | M | VL | VL | VL | L  | VL | L  |
| VL | M  | VH | M | VL | VL | H  | L  | VL | L  |
| VL | M  | H  | M | VL | VL | VH | L  | H  | L  |
| VL | M  | M  | M | VL | VL | VH | L  | H  | L  |
| VL | M  | L  | M | VL | VL | H  | L  | H  | L  |
| VL | L  | VH | M | VL | VL | H  | VL | VL | VL |
| VL | L  | H  | M | VL | VL | VH | VL | VH | VL |
| VL | L  | M  | M | VL | L  | VH | VL | VH | VL |
| VL | L  | L  | M | VL | L  | H  | VL | VH | VL |
| VL | VL | VH | M | VL | VL | VL | VL | VL | VL |
| VL | VL | H  | M | VL | VL | VL | VL | VL | VL |
| VL | VL | M  | M | VL | L  | VL | VL | VL | VL |
| VL | VL | L  | M | VL | L  | VL | VL | VL | VL |
| VH | VH | VH | L | VL | VL | VL | VL | VL | VL |
| VH | VH | H  | L | VL | VL | VL | VL | VL | VL |
| VH | VH | M  | L | VL | VL | VL | VL | VL | VL |
| VH | VH | L  | L | VL | VL | VL | VL | VL | VL |
| VH | H  | VH | L | VL | VL | VL | VH | VL | H  |
| VH | H  | H  | L | VL | VL | VL | VH | VL | H  |
| VH | H  | M  | L | VL | VL | VL | VH | VL | H  |
| VH | H  | L  | L | VL | VL | VL | VH | VL | H  |
| VH | M  | VH | L | VL | VL | L  | VH | VL | VH |
| VH | M  | H  | L | L  | VL | L  | VH | VL | VH |
| VH | M  | M  | L | L  | VL | L  | VH | VL | VH |

|    |    |    |   |    |    |    |    |    |    |
|----|----|----|---|----|----|----|----|----|----|
| VH | M  | L  | L | L  | VL | L  | VH | VL | VH |
| VH | L  | VH | L | VL | VL | L  | VL | VL | VL |
| VH | L  | H  | L | L  | VL | L  | VL | VL | VL |
| VH | L  | M  | L | L  | VL | L  | VL | VL | VL |
| VH | L  | L  | L | L  | VL | L  | VL | VL | VL |
| VH | VL | VH | L | VL | VL | VL | VL | VL | VL |
| VH | VL | H  | L | VL | VL | VL | VL | VL | VL |
| VH | VL | M  | L | VL | VL | VL | VL | VL | VL |
| VH | VL | L  | L | VL | VL | VL | VL | VL | VL |
| H  | VH | VH | L | VL | VL | VL | VL | VL | VL |
| H  | VH | H  | L | VL | VL | VL | VL | VL | VL |
| H  | VH | M  | L | VL | VL | VL | VL | VL | VL |
| H  | VH | L  | L | VL | VL | VL | VL | VL | VL |
| H  | H  | VH | L | VL | VL | VL | VH | VL | VH |
| H  | H  | H  | L | VL | VL | VL | VH | VL | VH |
| H  | H  | M  | L | VL | VL | VL | VH | VL | VH |
| H  | H  | L  | L | VL | VL | VL | VH | VL | VH |
| H  | M  | VH | L | VL | VL | L  | VH | VL | VH |
| H  | M  | H  | L | H  | VL | L  | VH | VL | VH |
| H  | M  | M  | L | H  | VL | L  | VH | VL | VH |
| H  | M  | L  | L | M  | VL | L  | VH | VL | VH |
| H  | L  | VH | L | VL | VL | L  | VL | VL | VL |
| H  | L  | H  | L | VH | VL | L  | VL | VL | VL |
| H  | L  | M  | L | VH | VL | L  | VL | VL | VL |
| H  | L  | L  | L | M  | VL | L  | VL | VL | VL |
| H  | VL | VH | L | VL | VL | L  | VL | VL | VL |
| H  | VL | H  | L | VL | VL | L  | VL | VL | VL |
| H  | VL | M  | L | VL | VL | L  | VL | VL | VL |
| H  | VL | L  | L | VL | VL | L  | VL | VL | VL |

|   |    |    |   |    |    |    |    |    |    |
|---|----|----|---|----|----|----|----|----|----|
| M | VH | VH | L | VL | VL | VL | VL | VL | VL |
| M | VH | H  | L | VL | VL | VL | VL | VL | VL |
| M | VH | M  | L | VL | VL | VL | VL | VL | VL |
| M | VH | L  | L | VL | VL | VL | VL | VL | VL |
| M | H  | VH | L | VL | VL | VL | H  | VL | H  |
| M | H  | H  | L | VL | VL | VL | H  | VL | H  |
| M | H  | M  | L | VL | VL | VL | H  | VL | H  |
| M | H  | L  | L | VL | VL | VL | H  | VL | H  |
| M | M  | VH | L | VL | VL | M  | M  | VL | H  |
| M | M  | H  | L | L  | VL | H  | M  | VL | H  |
| M | M  | M  | L | L  | VL | H  | M  | VL | H  |
| M | M  | L  | L | L  | L  | M  | M  | VL | H  |
| M | L  | VH | L | VL | VL | H  | VL | VL | VL |
| M | L  | H  | L | M  | VL | H  | VL | M  | VL |
| M | L  | M  | L | M  | L  | H  | VL | M  | VL |
| M | L  | L  | L | L  | M  | H  | VL | M  | VL |
| M | VL | VH | L | VL | VL | VL | VL | VL | VL |
| M | VL | H  | L | VL | VL | VL | VL | VL | VL |
| M | VL | M  | L | VL | VL | VL | VL | VL | VL |
| M | VL | L  | L | VL | L  | VL | VL | VL | VL |
| L | VH | VH | L | VL | VL | VL | VL | VL | VL |
| L | VH | H  | L | VL | VL | VL | VL | VL | VL |
| L | VH | M  | L | VL | VL | VL | VL | VL | VL |
| L | VH | L  | L | VL | VL | VL | VL | VL | VL |
| L | H  | VH | L | VL | VL | VL | L  | VL | M  |
| L | H  | H  | L | VL | VL | VL | L  | VL | M  |
| L | H  | M  | L | VL | VL | VL | L  | VL | M  |
| L | H  | L  | L | VL | VL | VL | L  | VL | M  |
| L | M  | VH | L | VL | L  | H  | L  | VL | M  |

|    |    |    |   |    |    |    |    |    |    |
|----|----|----|---|----|----|----|----|----|----|
| L  | M  | H  | L | VL | L  | VH | L  | H  | M  |
| L  | M  | M  | L | VL | L  | VH | L  | H  | M  |
| L  | M  | L  | L | VL | M  | H  | L  | H  | M  |
| L  | L  | VH | L | VL | VL | H  | VL | VL | VL |
| L  | L  | H  | L | VL | VL | VH | VL | VH | VL |
| L  | L  | M  | L | VL | H  | VH | VL | VH | VL |
| L  | L  | L  | L | VL | VH | H  | VL | VH | VL |
| L  | VL | VH | L | VL | VL | VL | VL | VL | VL |
| L  | VL | H  | L | VL | VL | VL | VL | VL | VL |
| L  | VL | M  | L | VL | M  | VL | VL | VL | VL |
| L  | VL | L  | L | VL | H  | VL | VL | VL | VL |
| VL | VH | VH | L | VL | VL | VL | VL | VL | VL |
| VL | VH | H  | L | VL | VL | VL | VL | VL | VL |
| VL | VH | M  | L | VL | VL | VL | VL | VL | VL |
| VL | VH | L  | L | VL | VL | VL | VL | VL | VL |
| VL | H  | VH | L | VL | VL | VL | L  | VL | L  |
| VL | H  | H  | L | VL | VL | VL | L  | VL | L  |
| VL | H  | M  | L | VL | VL | VL | L  | VL | L  |
| VL | H  | L  | L | VL | VL | VL | L  | VL | L  |
| VL | M  | VH | L | VL | L  | H  | L  | VL | L  |
| VL | M  | H  | L | VL | L  | VH | L  | H  | L  |
| VL | M  | M  | L | VL | L  | VH | L  | H  | L  |
| VL | M  | L  | L | VL | L  | H  | L  | H  | L  |
| VL | L  | VH | L | VL | VL | H  | VL | VL | VL |
| VL | L  | H  | L | VL | VL | VH | VL | VH | VL |
| VL | L  | M  | L | VL | L  | VH | VL | VH | VL |
| VL | L  | L  | L | VL | L  | H  | VL | VH | VL |
| VL | VL | VH | L | VL | VL | VL | VL | VL | VL |
| VL | VL | H  | L | VL | VL | VL | VL | VL | VL |

|    |    |    |    |    |    |    |    |    |    |
|----|----|----|----|----|----|----|----|----|----|
| VL | VL | M  | L  | VL | L  | VL | VL | VL | VL |
| VL | VL | L  | L  | VL | L  | VL | VL | VL | VL |
| VH | VH | VH | VL |
| VH | VH | H  | VL |
| VH | VH | M  | VL |
| VH | VH | L  | VL |
| VH | H  | VH | VL | VL | VL | VL | VH | VL | H  |
| VH | H  | H  | VL | VL | VL | VL | VH | VL | H  |
| VH | H  | M  | VL | VL | VL | VL | VH | VL | H  |
| VH | H  | L  | VL | VL | VL | VL | VH | VL | H  |
| VH | M  | VH | VL | VL | VL | L  | VH | VL | VH |
| VH | M  | H  | VL | L  | VL | L  | VH | VL | VH |
| VH | M  | M  | VL | L  | VL | L  | VH | VL | VH |
| VH | M  | L  | VL | L  | VL | L  | VH | VL | VH |
| VH | L  | VH | VL | VL | VL | L  | VL | VL | VL |
| VH | L  | H  | VL | L  | VL | L  | VL | VL | VL |
| VH | L  | M  | VL | L  | VL | L  | VL | VL | VL |
| VH | L  | L  | VL | L  | VL | L  | VL | VL | VL |
| VH | VL | VH | VL |
| VH | VL | H  | VL |
| VH | VL | M  | VL |
| VH | VL | L  | VL |
| H  | VH | VH | VL |
| H  | VH | H  | VL |
| H  | VH | M  | VL |
| H  | VH | L  | VL |
| H  | H  | VH | VL | VL | VL | VL | VH | VL | VH |
| H  | H  | H  | VL | VL | VL | VL | VH | VL | VH |
| H  | H  | M  | VL | VL | VL | VL | VH | VL | VH |

|   |    |    |    |    |    |    |    |    |    |
|---|----|----|----|----|----|----|----|----|----|
| H | H  | L  | VL | VL | VL | VL | VH | VL | VH |
| H | M  | VH | VL | VL | VL | L  | VH | VL | VH |
| H | M  | H  | VL | H  | VL | L  | VH | VL | VH |
| H | M  | M  | VL | H  | VL | L  | VH | VL | VH |
| H | M  | L  | VL | M  | VL | L  | VH | VL | VH |
| H | L  | VH | VL | VL | VL | L  | VL | VL | VL |
| H | L  | H  | VL | VH | VL | L  | VL | VL | VL |
| H | L  | M  | VL | VH | VL | L  | VL | VL | VL |
| H | L  | L  | VL | M  | VL | L  | VL | VL | VL |
| H | VL | VH | VL | VL | VL | L  | VL | VL | VL |
| H | VL | H  | VL | VL | VL | L  | VL | VL | VL |
| H | VL | M  | VL | VL | VL | L  | VL | VL | VL |
| H | VL | L  | VL | VL | VL | L  | VL | VL | VL |
| M | VH | VH | VL |
| M | VH | H  | VL |
| M | VH | M  | VL |
| M | VH | L  | VL |
| M | H  | VH | VL | VL | VL | VL | H  | VL | H  |
| M | H  | H  | VL | VL | VL | VL | H  | VL | H  |
| M | H  | M  | VL | VL | VL | VL | H  | VL | H  |
| M | H  | L  | VL | VL | VL | VL | H  | VL | H  |
| M | M  | VH | VL | VL | VL | M  | M  | VL | H  |
| M | M  | H  | VL | L  | VL | H  | M  | VL | H  |
| M | M  | M  | VL | L  | VL | H  | M  | VL | H  |
| M | M  | L  | VL | L  | L  | M  | M  | VL | H  |
| M | L  | VH | VL | VL | VL | H  | VL | VL | VL |
| M | L  | H  | VL | M  | VL | H  | VL | L  | VL |
| M | L  | M  | VL | M  | L  | H  | VL | L  | VL |
| M | L  | L  | VL | L  | M  | H  | VL | L  | VL |



|    |    |    |    |    |    |    |    |    |    |
|----|----|----|----|----|----|----|----|----|----|
| M  | VL | VH | VL |
| M  | VL | H  | VL |
| M  | VL | M  | VL |
| M  | VL | L  | VL | VL | L  | VL | VL | VL | VL |
| L  | VH | VH | VL |
| L  | VH | H  | VL |
| L  | VH | M  | VL |
| L  | VH | L  | VL |
| L  | H  | VH | VL | VL | VL | VL | L  | VL | M  |
| L  | H  | H  | VL | VL | VL | VL | L  | VL | M  |
| L  | H  | M  | VL | VL | VL | VL | L  | VL | M  |
| L  | H  | L  | VL | VL | VL | VL | L  | VL | M  |
| L  | M  | VH | VL | VL | L  | H  | L  | VL | M  |
| L  | M  | H  | VL | VL | L  | VH | L  | L  | M  |
| L  | M  | M  | VL | VL | L  | VH | L  | L  | M  |
| L  | M  | L  | VL | VL | M  | H  | L  | L  | M  |
| L  | L  | VH | VL | VL | VL | H  | VL | VL | VL |
| L  | L  | H  | VL | VL | VL | VH | VL | M  | VL |
| L  | L  | M  | VL | VL | H  | VH | VL | M  | VL |
| L  | L  | L  | VL | VL | VH | H  | VL | M  | VL |
| L  | VL | VH | VL |
| L  | VL | H  | VL |
| L  | VL | M  | VL | VL | M  | VL | VL | VL | VL |
| L  | VL | L  | VL | VL | H  | VL | VL | VL | VL |
| VL | VH | VH | VL |
| VL | VH | H  | VL |
| VL | VH | M  | VL |
| VL | VH | L  | VL |
| VL | H  | VH | VL | VL | VL | VL | L  | VL | L  |

|    |    |    |    |    |    |    |    |    |    |
|----|----|----|----|----|----|----|----|----|----|
| VL | H  | H  | VL | VL | VL | VL | L  | VL | L  |
| VL | H  | M  | VL | VL | VL | VL | L  | VL | L  |
| VL | H  | L  | VL | VL | VL | VL | L  | VL | L  |
| VL | M  | VH | VL | VL | L  | H  | L  | VL | L  |
| VL | M  | H  | VL | VL | L  | VH | L  | VH | L  |
| VL | M  | M  | VL | VL | L  | VH | L  | VH | L  |
| VL | M  | L  | VL | VL | M  | H  | L  | VH | L  |
| VL | L  | VH | VL | VL | VL | H  | VL | VL | VL |
| VL | L  | H  | VL | VL | VL | VH | VL | VH | VL |
| VL | L  | M  | VL | VL | L  | VH | VL | VH | VL |
| VL | L  | L  | VL | VL | L  | H  | VL | VH | VL |
| VL | VL | VH | VL |
| VL | VL | H  | VL |
| VL | VL | M  | VL | VL | L  | VL | VL | VL | VL |
| VL | VL | L  | VL | VL | L  | VL | VL | VL | VL |

**Table S1.** Fuzzy sets and rules for the studied habitats, namely for adults (during the winter, the summer and autumn, during pre-reproduction, and spawning), larvae, and juveniles *C. nasus* at the Isar river (Germany) considering the input variables (i.e. velocity, water depth, Substratum, recreational pressure). VL – Very low; L – Low; M – Medium; H – High; VH – Very high.
