# Supplementary material
Source: MDPI journal article supplement (https://www.mdpi.com/2071-1050/10/6/1747)
Supplement: s1 [file s1]

|                            |                      | Without Users |       |          |        | With User    |       |          |        |
|----------------------------|----------------------|---------------|-------|----------|--------|--------------|-------|----------|--------|
|                            |                      | Not suitable  | Low   | Moderate | High   | Not suitable | Low   | Moderate | High   |
| Suitability                |                      |               |       |          |        |              |       |          |        |
| <b>Discharge NQ</b>        |                      |               |       |          |        |              |       |          |        |
| 1: Adults Spawning         | WUA in m²            | 690325        | 6300  | 14150    | 6775   | 692650       | 11150 | 7500     | 6250   |
|                            | % of the wetted area | 96            | 1     | 2        | 1      | 96           | 2     | 1        | 1      |
| 2: Larvea                  | WUA in m²            | 541950        | 25800 | 142825   | 6975   | 513000       | 93275 | 108800   | 2475   |
|                            | % of the wetted area | 75            | 4     | 20       | 1      | 71           | 13    | 15       | 0      |
| 3: Juveniles               | WUA in m²            | 283775        | 2825  | 25300    | 405650 | 309975       | 3400  | 25750    | 378425 |
|                            | % of the wetted area | 40            | 0     | 4        | 57     | 43           | 0     | 4        | 53     |
| 4 Adults in Winter         | WUA in m²            | 657175        | 12175 | 31575    | 16625  | 653650       | 12125 | 32575    | 19200  |
|                            | % of the wetted area | 92            | 2     | 4        | 2      | 91           | 2     | 5        | 3      |
| 5: Adults Pre-reproduction | WUA in m²            | 386700        | 12950 | 21300    | 296600 | 396575       | 12600 | 14300    | 294075 |
|                            | % of the wetted area | 54            | 2     | 3        | 41     | 55           | 2     | 2        | 41     |
| 6: Adults in Summer/Autumn | WUA in m²            | 567475        | 25900 | 75925    | 48250  | 561550       | 26725 | 78175    | 51100  |
|                            | % of the wetted area | 79            | 4     | 11       | 7      | 78           | 4     | 11       | 7      |
| <b>Discharge MNQ</b>       |                      |               |       |          |        |              |       |          |        |
| 1: Adults Spawning         | WUA in m²            | 728150        | 6975  | 13350    | 6775   | 733550       | 11300 | 7325     | 6150   |
|                            | % of the wetted area | 95            | 1     | 2        | 1      | 96           | 2     | 1        | 1      |
| 2: Larvea                  | WUA in m²            | 641950        | 20550 | 86350    | 6000   | 613600       | 68850 | 65425    | 2150   |
|                            | % of the wetted area | 84            | 3     | 14       | 1      | 80           | 12    | 11       | 0      |
| 3: Juveniles               | WUA in m²            | 372575        | 4125  | 20300    | 364275 | 401575       | 4125  | 20025    | 341800 |
|                            | % of the wetted area | 49            | 1     | 3        | 47     | 52           | 1     | 3        | 45     |
| 4 Adults in Winter         | WUA in m²            | 628650        | 16725 | 36425    | 77050  | 626475       | 15700 | 33550    | 83275  |
|                            | % of the wetted area | 82            | 3     | 6        | 10     | 82           | 3     | 6        | 11     |
| 5: Adults Pre-reproduction | WUA in m²            | 462475        | 12225 | 21350    | 273725 | 470750       | 12850 | 13775    | 271800 |
|                            | % of the wetted area | 60            | 2     | 4        | 36     | 61           | 2     | 2        | 35     |
| 6: Adults in Summer/Autumn | WUA in m²            | 537775        | 28150 | 83875    | 114900 | 534300       | 26075 | 80375    | 116675 |
|                            | % of the wetted area | 70            | 5     | 14       | 15     | 70           | 4     | 13       | 15     |

|                            |                       |        |       |        |        |        |       |        |        |
|----------------------------|-----------------------|--------|-------|--------|--------|--------|-------|--------|--------|
| <b>Discharge MQ</b>        |                       |        |       |        |        |        |       |        |        |
| 1: Adults Spawning         | WUA in m <sup>2</sup> | 559100 | 6975  | 13350  | 16000  | 562450 | 11300 | 7325   | 14350  |
|                            | % of the wetted area  | 94     | 1     | 2      | 3      | 94     | 2     | 1      | 2      |
| 2: Larvea                  | WUA in m <sup>2</sup> | 481400 | 20550 | 86350  | 7125   | 459975 | 68850 | 65425  | 1175   |
|                            | % of the wetted area  | 81     | 3     | 14     | 1      | 77     | 12    | 11     | 0      |
| 3: Juveniles               | WUA in m <sup>2</sup> | 245425 | 4125  | 20300  | 325575 | 275950 | 4125  | 20025  | 295325 |
|                            | % of the wetted area  | 41     | 1     | 3      | 55     | 46     | 1     | 3      | 50     |
| 4: Adults in Winter        | WUA in m <sup>2</sup> | 506350 | 16725 | 36425  | 35925  | 511200 | 15700 | 33550  | 34975  |
|                            | % of the wetted area  | 85     | 3     | 6      | 6      | 86     | 3     | 6      | 6      |
| 5: Adults Pre-reproduction | WUA in m <sup>2</sup> | 354125 | 12225 | 21350  | 207725 | 358550 | 12850 | 13775  | 210250 |
|                            | % of the wetted area  | 59     | 2     | 4      | 35     | 60     | 2     | 2      | 35     |
| 6: Adults in Summer/Autumn | WUA in m <sup>2</sup> | 412375 | 28150 | 83875  | 71025  | 423125 | 26075 | 80375  | 65850  |
|                            | % of the wetted area  | 69     | 5     | 14     | 12     | 71     | 4     | 13     | 11     |
| <b>Discharge HQ1</b>       |                       |        |       |        |        |        |       |        |        |
| 1: Adults Spawning         | WUA in m <sup>2</sup> | 755075 | 10325 | 22275  | 23875  | 763525 | 14400 | 14175  | 19450  |
|                            | % of the wetted area  | 93     | 1     | 3      | 3      | 94     | 2     | 2      | 2      |
| 2: Larvea                  | WUA in m <sup>2</sup> | 646500 | 27375 | 129050 | 8625   | 622375 | 91325 | 95125  | 2725   |
|                            | % of the wetted area  | 80     | 3     | 16     | 1      | 77     | 11    | 12     | 0      |
| 3: Juveniles               | WUA in m <sup>2</sup> | 374300 | 6675  | 44300  | 386275 | 426575 | 5525  | 34775  | 344675 |
|                            | % of the wetted area  | 46     | 1     | 5      | 48     | 53     | 1     | 4      | 42     |
| 4 Adults in Winter         | WUA in m <sup>2</sup> | 640175 | 27125 | 65525  | 78725  | 651100 | 25425 | 55700  | 79325  |
|                            | % of the wetted area  | 79     | 3     | 8      | 10     | 80     | 3     | 7      | 10     |
| 5: Adults Pre-reproduction | WUA in m <sup>2</sup> | 531925 | 13350 | 22050  | 244225 | 539150 | 14450 | 13750  | 244200 |
|                            | % of the wetted area  | 66     | 2     | 3      | 30     | 66     | 2     | 2      | 30     |
| 6: Adults in Summer/Autumn | WUA in m <sup>2</sup> | 510325 | 35325 | 125950 | 139950 | 529050 | 34500 | 119750 | 128250 |
|                            | % of the wetted area  | 63     | 4     | 16     | 17     | 65     | 4     | 15     | 16     |
| <b>Discharge HQ2</b>       |                       |        |       |        |        |        |       |        |        |
| 1: Adults Spawning         | WUA in m <sup>2</sup> | 619100 | 11125 | 21525  | 30950  | 632175 | 14750 | 12675  | 23100  |
|                            | % of the wetted area  | 91     | 2     | 3      | 5      | 93     | 2     | 2      | 3      |

|                            |                       |        |       |        |        |        |       |        |        |
|----------------------------|-----------------------|--------|-------|--------|--------|--------|-------|--------|--------|
| 2: Larvea                  | WUA in m <sup>2</sup> | 586000 | 18775 | 71000  | 6925   | 570025 | 57875 | 52775  | 2025   |
|                            | % of the wetted area  | 86     | 3     | 10     | 1      | 83     | 8     | 8      | 0      |
| 3: Juveniles               | WUA in m <sup>2</sup> | 334350 | 6325  | 32725  | 309300 | 393875 | 5150  | 22450  | 261225 |
|                            | % of the wetted area  | 49     | 1     | 5      | 45     | 58     | 1     | 3      | 38     |
| 4: Adults in Winter        | WUA in m <sup>2</sup> | 472100 | 26925 | 74275  | 109400 | 494400 | 23525 | 57725  | 107050 |
|                            | % of the wetted area  | 69     | 4     | 11     | 16     | 72     | 3     | 8      | 16     |
| 5: Adults Pre-reproduction | WUA in m <sup>2</sup> | 473075 | 10425 | 15550  | 183650 | 487425 | 11075 | 10200  | 174000 |
|                            | % of the wetted area  | 69     | 2     | 2      | 27     | 71     | 2     | 1      | 25     |
| 6: Adults in Summer/Autumn | WUA in m <sup>2</sup> | 382650 | 20775 | 103050 | 176225 | 413075 | 20275 | 92775  | 156575 |
|                            | % of the wetted area  | 56     | 3     | 15     | 26     | 60     | 3     | 14     | 23     |
| <b>Discharge HQ5</b>       |                       |        |       |        |        |        |       |        |        |
| 1: Adults Spawning         | WUA in m <sup>2</sup> | 874400 | 11000 | 20875  | 32525  | 888550 | 14500 | 11150  | 24600  |
|                            | % of the wetted area  | 93     | 1     | 2      | 3      | 95     | 2     | 1      | 3      |
| 2: Larvea                  | WUA in m <sup>2</sup> | 846975 | 18800 | 65975  | 7050   | 823925 | 64150 | 48975  | 1750   |
|                            | % of the wetted area  | 90     | 2     | 7      | 1      | 88     | 7     | 5      | 0      |
| 3: Juveniles               | WUA in m <sup>2</sup> | 593800 | 6275  | 30150  | 308575 | 641550 | 5125  | 21075  | 271050 |
|                            | % of the wetted area  | 63     | 1     | 3      | 33     | 68     | 1     | 2      | 29     |
| 4: Adults in Winter        | WUA in m <sup>2</sup> | 667800 | 29350 | 76475  | 165175 | 690500 | 26100 | 59625  | 162575 |
|                            | % of the wetted area  | 71     | 3     | 8      | 18     | 74     | 3     | 6      | 17     |
| 5: Adults Pre-reproduction | WUA in m <sup>2</sup> | 737125 | 10350 | 16175  | 175150 | 739550 | 10825 | 10800  | 177625 |
|                            | % of the wetted area  | 78     | 1     | 2      | 19     | 79     | 1     | 1      | 19     |
| 6: Adults in Summer/Autumn | WUA in m <sup>2</sup> | 562825 | 24950 | 116950 | 234075 | 594925 | 23975 | 106225 | 213675 |
|                            | % of the wetted area  | 60     | 3     | 12     | 25     | 63     | 3     | 11     | 23     |
| <b>Discharge HQ10</b>      |                       |        |       |        |        |        |       |        |        |
| 1: Adults Spawning         | WUA in m <sup>2</sup> | 899375 | 11050 | 21775  | 32425  | 913850 | 14775 | 11750  | 24250  |
|                            | % of the wetted area  | 93     | 1     | 2      | 3      | 95     | 2     | 1      | 3      |
| 2: Larvea                  | WUA in m <sup>2</sup> | 873100 | 18200 | 66425  | 6900   | 851825 | 62600 | 48550  | 1650   |
|                            | % of the wetted area  | 90     | 2     | 7      | 1      | 88     | 6     | 5      | 0      |
| 3: Juveniles               | WUA in m <sup>2</sup> | 618125 | 6325  | 29900  | 310275 | 666650 | 5025  | 21850  | 271100 |

|                            |                       |         |       |        |        |         |       |        |        |
|----------------------------|-----------------------|---------|-------|--------|--------|---------|-------|--------|--------|
|                            | % of the wetted area  | 64      | 1     | 3      | 32     | 69      | 1     | 2      | 28     |
| 4: Adults in Winter        | WUA in m <sup>2</sup> | 696225  | 28875 | 78525  | 161000 | 718475  | 25625 | 61725  | 158800 |
|                            | % of the wetted area  | 72      | 3     | 8      | 17     | 74      | 3     | 6      | 16     |
| 5: Adults Pre-reproduction | WUA in m <sup>2</sup> | 762050  | 10400 | 16725  | 175450 | 764675  | 10850 | 11425  | 177675 |
|                            | % of the wetted area  | 79      | 1     | 2      | 18     | 79      | 1     | 1      | 18     |
| 6: Adults in Summer/Autumn | WUA in m <sup>2</sup> | 590675  | 25700 | 116825 | 231425 | 623425  | 24350 | 105225 | 211625 |
|                            | % of the wetted area  | 61      | 3     | 12     | 24     | 65      | 3     | 11     | 22     |
| <b>Discharge HQ50</b>      |                       |         |       |        |        |         |       |        |        |
| 1: Adults Spawning         | WUA in m <sup>2</sup> | 1343425 | 5625  | 14725  | 16575  | 1354350 | 5200  | 9275   | 11525  |
|                            | % of the wetted area  | 97      | 0     | 1      | 1      | 98      | 0     | 1      | 1      |
| 2: Larvea                  | WUA in m <sup>2</sup> | 1308675 | 12875 | 55200  | 3600   | 1245800 | 89000 | 43575  | 1975   |
|                            | % of the wetted area  | 95      | 1     | 4      | 0      | 90      | 6     | 3      | 0      |
| 3: Juveniles               | WUA in m <sup>2</sup> | 1181550 | 3300  | 15025  | 180475 | 1150025 | 2350  | 15500  | 212475 |
|                            | % of the wetted area  | 86      | 0     | 1      | 13     | 83      | 0     | 1      | 15     |
| 4: Adults in Winter        | WUA in m <sup>2</sup> | 1156525 | 7575  | 19775  | 196475 | 1179650 | 7525  | 20450  | 172725 |
|                            | % of the wetted area  | 84      | 1     | 1      | 14     | 85      | 1     | 1      | 13     |
| 5: Adults Pre-reproduction | WUA in m <sup>2</sup> | 1224925 | 4075  | 7125   | 144225 | 1185575 | 4925  | 5100   | 184750 |
|                            | % of the wetted area  | 89      | 0     | 1      | 10     | 86      | 0     | 0      | 13     |
| 6: Adults in Summer/Autumn | WUA in m <sup>2</sup> | 1120875 | 10225 | 34125  | 215125 | 1144500 | 10700 | 35250  | 189900 |
|                            | % of the wetted area  | 81      | 1     | 2      | 16     | 83      | 1     | 3      | 14     |
| <b>Discharge HQ100</b>     |                       |         |       |        |        |         |       |        |        |
| 1: Adults Spawning         | WUA in m <sup>2</sup> | 1412400 | 5975  | 14200  | 14725  | 1423500 | 5950  | 8250   | 9600   |
|                            | % of the wetted area  | 98      | 0     | 1      | 1      | 98      | 0     | 1      | 1      |
| 2: Larvea                  | WUA in m <sup>2</sup> | 1358250 | 15450 | 67825  | 5775   | 1290725 | 97000 | 56725  | 2850   |
|                            | % of the wetted area  | 94      | 1     | 5      | 0      | 89      | 7     | 4      | 0      |
| 3: Juveniles               | WUA in m <sup>2</sup> | 1225550 | 3375  | 20300  | 198075 | 1193575 | 2525  | 19675  | 231525 |
|                            | % of the wetted area  | 85      | 0     | 1      | 14     | 82      | 0     | 1      | 16     |
| 4: Adults in Winter        | WUA in m <sup>2</sup> | 1238650 | 8050  | 25550  | 175050 | 1257700 | 7925  | 24300  | 157375 |
|                            | % of the wetted area  | 86      | 1     | 2      | 12     | 87      | 1     | 2      | 11     |

|                            |                       |         |       |       |        |         |       |       |        |
|----------------------------|-----------------------|---------|-------|-------|--------|---------|-------|-------|--------|
| 5: Adults Pre-reproduction | WUA in m <sup>2</sup> | 1279675 | 5400  | 9800  | 152425 | 1238050 | 6375  | 7550  | 195325 |
|                            | % of the wetted area  | 88      | 0     | 1     | 11     | 86      | 0     | 1     | 13     |
| 6: Adults in Summer/Autumn | WUA in m <sup>2</sup> | 1193075 | 13175 | 41900 | 199150 | 1210025 | 14875 | 43825 | 178575 |
|                            | % of the wetted area  | 82      | 1     | 3     | 14     | 84      | 1     | 3     | 12     |

**Table S2.** Wetted area and relative percent of the wetted area with not suitable (HSI<0.1), low suitability (HSI between 0.1 and 0.3), medium suitability (HSI between 0.3 and 0.6) and high suitability (HSI>0.6) at MQ. Table S2 presents all the scenarios.
