# Supplementary material
Source: MDPI journal article supplement (https://www.mdpi.com/2071-1050/10/6/1747)
Supplement: s1 [file s1]

|                                         |                             | Discharges |      |      |      |       |      |       |      |       |
|-----------------------------------------|-----------------------------|------------|------|------|------|-------|------|-------|------|-------|
|                                         |                             | NQ         | MNQ  | MQ   | HQ1  | HQ2   | HQ5  | HQ10  | HQ50 | HQ100 |
| <b>Habitat type 1: Adults spawning</b>  |                             |            |      |      |      |       |      |       |      |       |
| Without recreation users                | WUA (1.000 m <sup>2</sup> ) | 27         | 31   | 32   | 18   | 16    | 17   | 15    | 11   | 5     |
|                                         | HHS                         | 0.03       | 0.05 | 0.03 | 0.01 | 0.01  | 0.01 | 0.01  | 0.01 | 0.00  |
|                                         | mean HSI                    | 0.63       | 0.88 | 0.85 | 0.51 | 0.46  | 0.32 | 0.22  | 0.05 | 0.01  |
| With recreational users                 | WUA (1.000 m <sup>2</sup> ) | 21         | 23   | 24   | 12   | 11    | 11   | 10    | 7    | 2     |
|                                         | HHS                         | 0.03       | 0.03 | 0.03 | 0.01 | 0.01  | 0.01 | 0.01  | 0.00 | 0.00  |
|                                         | mean HSI                    | 0.69       | 0.82 | 0.90 | 0.48 | 0.40  | 0.41 | 0.32  | 0.04 | 0.00  |
| <b>Habitat type 2: Larvae</b>           |                             |            |      |      |      |       |      |       |      |       |
| Without recreation users                | WUA (1.000 m <sup>2</sup> ) | 59         | 35   | 33   | 28   | 32    | 42   | 38    | 44   | 37    |
|                                         | HHS                         | 0.07       | 0.05 | 0.04 | 0.02 | 0.02  | 0.03 | 0.02  | 0.02 | 0.02  |
|                                         | mean HSI                    | 0.52       | 0.64 | 0.69 | 0.28 | 0.275 | 0.2  | 0.255 | 0.1  | 0.155 |
| With recreational users                 | WUA (1.000 m <sup>2</sup> ) | 51         | 30   | 30   | 31   | 38    | 51   | 43    | 50   | 51    |
|                                         | HHS                         | 0.06       | 0.04 | 0.03 | 0.02 | 0.03  | 0.03 | 0.02  | 0.03 | 0.03  |
|                                         | mean HSI                    | 0.58       | 0.66 | 0.69 | 0.28 | 0.26  | 0.13 | 0.23  | 0.13 | 0.09  |
| <b>Habitat type 3: Juveniles</b>        |                             |            |      |      |      |       |      |       |      |       |
| Without recreation users                | WUA (1.000 m <sup>2</sup> ) | 330        | 270  | 269  | 145  | 158   | 185  | 187   | 171  | 153   |
|                                         | HHS                         | 0.41       | 0.39 | 0.28 | 0.10 | 0.11  | 0.11 | 0.11  | 0.09 | 0.08  |
|                                         | mean HSI                    | 4.89       | 5.05 | 4.87 | 2.30 | 2.16  | 1.29 | 1.07  | 0.61 | 0.38  |
| With recreational users                 | WUA (1.000 m <sup>2</sup> ) | 291        | 224  | 232  | 167  | 182   | 210  | 197   | 185  | 195   |
|                                         | HHS                         | 0.36       | 0.33 | 0.24 | 0.12 | 0.13  | 0.13 | 0.12  | 0.10 | 0.10  |
|                                         | mean HSI                    | 4.21       | 3.43 | 3.49 | 1.78 | 1.44  | 1.01 | 0.77  | 0.54 | 0.29  |
| <b>Habitat type 4: Adults in winter</b> |                             |            |      |      |      |       |      |       |      |       |
| Without recreation users                | WUA (1.000 m <sup>2</sup> ) | 100        | 130  | 183  | 199  | 180   | 181  | 193   | 177  | 162   |
|                                         | HHS                         | 0.12       | 0.19 | 0.19 | 0.14 | 0.12  | 0.11 | 0.11  | 0.09 | 0.08  |
|                                         | mean HSI                    | 2.88       | 3.62 | 3.79 | 3.09 | 3.16  | 2.26 | 1.79  | 0.96 | 0.88  |
| With recreational users                 | WUA (1.000 m <sup>2</sup> ) | 94         | 117  | 170  | 176  | 161   | 169  | 179   | 155  | 145   |
|                                         | HHS                         | 0.12       | 0.17 | 0.18 | 0.13 | 0.11  | 0.10 | 0.11  | 0.08 | 0.07  |

|                                                    |                             |      |      |      |      |      |      |      |      |      |
|----------------------------------------------------|-----------------------------|------|------|------|------|------|------|------|------|------|
|                                                    | mean HSI                    | 1.71 | 2.22 | 2.38 | 2.25 | 2.07 | 1.96 | 1.85 | 0.83 | 1.19 |
| <b>Habitat type 5: Adults pre-reproduction</b>     |                             |      |      |      |      |      |      |      |      |      |
| Without recreation users                           | WUA (1.000 m <sup>2</sup> ) | 247  | 186  | 178  | 145  | 154  | 196  | 189  | 189  | 184  |
|                                                    | HHS                         | 0.30 | 0.27 | 0.19 | 0.11 | 0.11 | 0.12 | 0.11 | 0.10 | 0.09 |
|                                                    | mean HSI                    | 3.49 | 3.06 | 2.88 | 1.66 | 1.42 | 0.72 | 1.15 | 0.38 | 0.13 |
| With recreational users                            | WUA (1.000 m <sup>2</sup> ) | 243  | 172  | 176  | 183  | 195  | 241  | 219  | 221  | 257  |
|                                                    | HHS                         | 0.30 | 0.25 | 0.19 | 0.13 | 0.13 | 0.15 | 0.13 | 0.12 | 0.13 |
|                                                    | mean HSI                    | 2.12 | 2.21 | 1.92 | 1.32 | 0.63 | 0.43 | 0.61 | 0.35 | 0.13 |
| <b>Habitat type 6: Adults in summer and autumn</b> |                             |      |      |      |      |      |      |      |      |      |
| Without recreation users                           | WUA (1.000 m <sup>2</sup> ) | 167  | 186  | 238  | 195  | 184  | 191  | 204  | 188  | 170  |
|                                                    | HHS                         | 0.21 | 0.27 | 0.25 | 0.14 | 0.13 | 0.12 | 0.12 | 0.10 | 0.08 |
|                                                    | mean HSI                    | 2.81 | 2.95 | 3.20 | 2.32 | 2.14 | 1.74 | 1.92 | 1.03 | 1.05 |
| With recreational users                            | WUA (1.000 m <sup>2</sup> ) | 256  | 165  | 217  | 173  | 167  | 178  | 190  | 167  | 154  |
|                                                    | HHS                         | 0.19 | 0.24 | 0.22 | 0.13 | 0.12 | 0.11 | 0.11 | 0.09 | 0.08 |
|                                                    | mean HSI                    | 2.18 | 2.88 | 3.59 | 2.63 | 2.69 | 2.16 | 1.56 | 0.8  | 0.55 |

**Table S3.** Weighted Usable Area (WUA), Hydraulic Habitat Suitability index (HHS), and Mean Habitat Suitability Index (mean HSI) value for each habitat and all scenarios
